# Supplementary material for: Nitrogen and sulfur co-doped fluorescent carbon dots for the trapping of Hg(ii) ions from water
Source: Royal Society of Chemistry journal article supplement (doi:10.1039/d0ma00448k), 2020-01-01
Supplement: d0ma00448k1.pdf [file d0ma00448k1.pdf]

## **SUPPORTING INFORMATION**

### **Nitrogen and Sulfur Co-Doped Fluorescent Carbon Dots for Trapping of Hg(II) Ions from Water**

Harpreet Kaur<sup>a</sup>, Navneet Kaur<sup>\*b</sup>, Narinder Singh<sup>\*c</sup>

<sup>a</sup>*Centre for Nanoscience and Nanotechnology, Panjab University, Chandigarh-160014*

<sup>b</sup>*Department of Chemistry, Panjab University, Chandigarh-160014*

<sup>c</sup>*Department of Chemistry, IIT Ropar, Roopnagar, Punjab-140001*

*\*Corresponding author (Navneet Kaur) E-mail: [navneetkaur@pu.ac.in](mailto:navneetkaur@pu.ac.in); Tel: +91-1722534405  
and (Narinder Singh) E-mail: [nsingh@iitrpr.ac.in](mailto:nsingh@iitrpr.ac.in); Tel: +91-1881242176.*

#### **TABLE OF CONTENTS:**

Figure S1: ESI-MS spectra of Receptor 1

Figure S2: <sup>1</sup>H NMR of Receptor 1

Figure S3: <sup>13</sup>C NMR of Receptor 1

Figure S4: Fluorescence spectra showing stability of the CDs in the absence and presence of Hg<sup>2+</sup> ions in a wide range of pH.

Figure S5: Time-dependent variation in fluorescence emission intensity of the CDs upon addition of different concentrations of Hg<sup>2+</sup> ions.

Figure S6: Scanning Emission Micrographs of (A) Bare silica of mesh size 60-120, and (B) Silica coated with CDs.

Figure S7: Fluorescence emission profile of CDs upon addition of increasing concentrations of perchlorate salt.

Figure S8: Zeta Potential Report of CDs.

Figure S9: UV-Visible spectra of CDs on addition of increasing concentrations of Hg<sup>2+</sup> ions (0-55 μM).

Figure S10: Fluorescence response of CDs upon addition of various anions.

Figure S11: Fluorescence emission spectra of CDs in the presence of Hg<sup>2+</sup> ions in the presence of an array of anions as interferent species.

Figure S12: Cyclic Voltammogram of CDs.

Figure S13: TAUC Plot of the CDs.

Figure S14: Fluorescence emission spectra of CDs containing Hg<sup>2+</sup> ions in the presence of EDTA and tetrabutylammonium hydroxide.

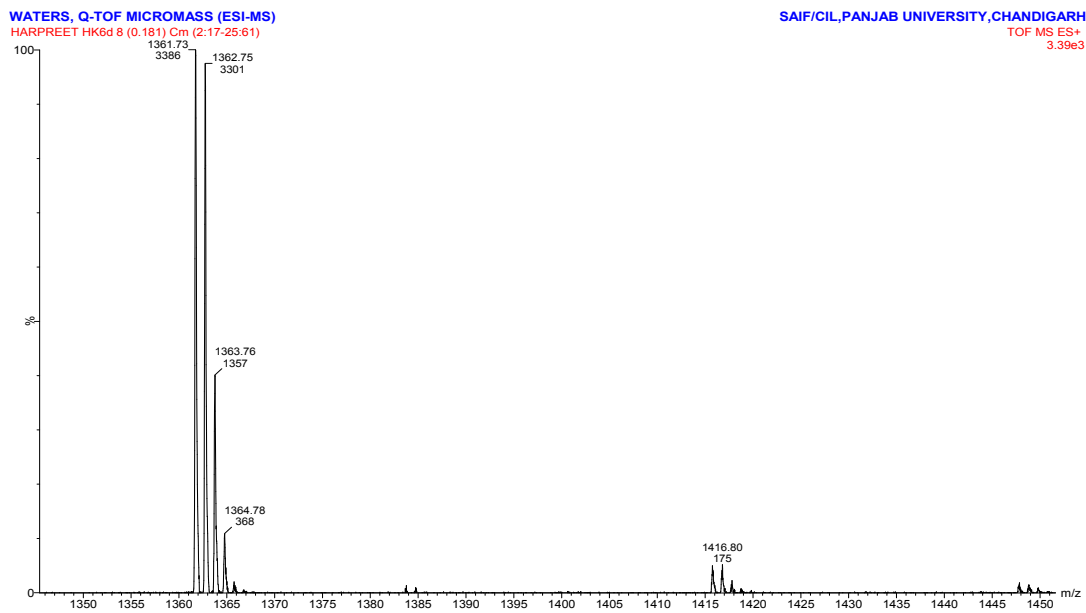

Figure S1: ESI-MS spectra of Receptor 1

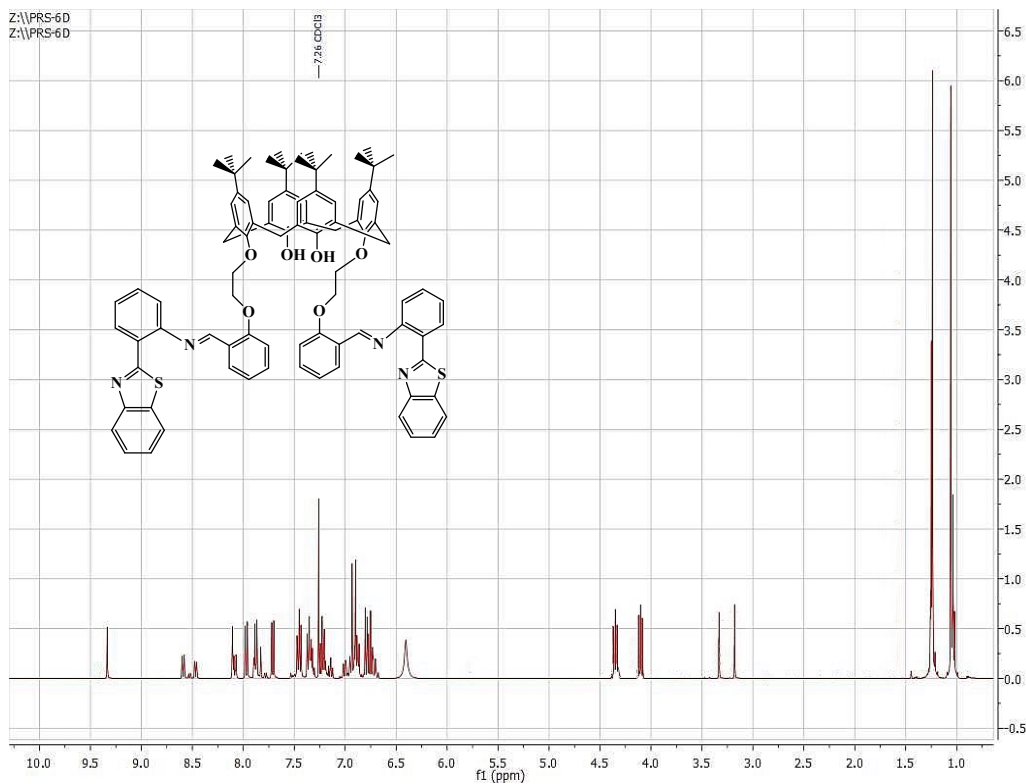

Figure S2: <sup>1</sup>H NMR of Receptor 1.

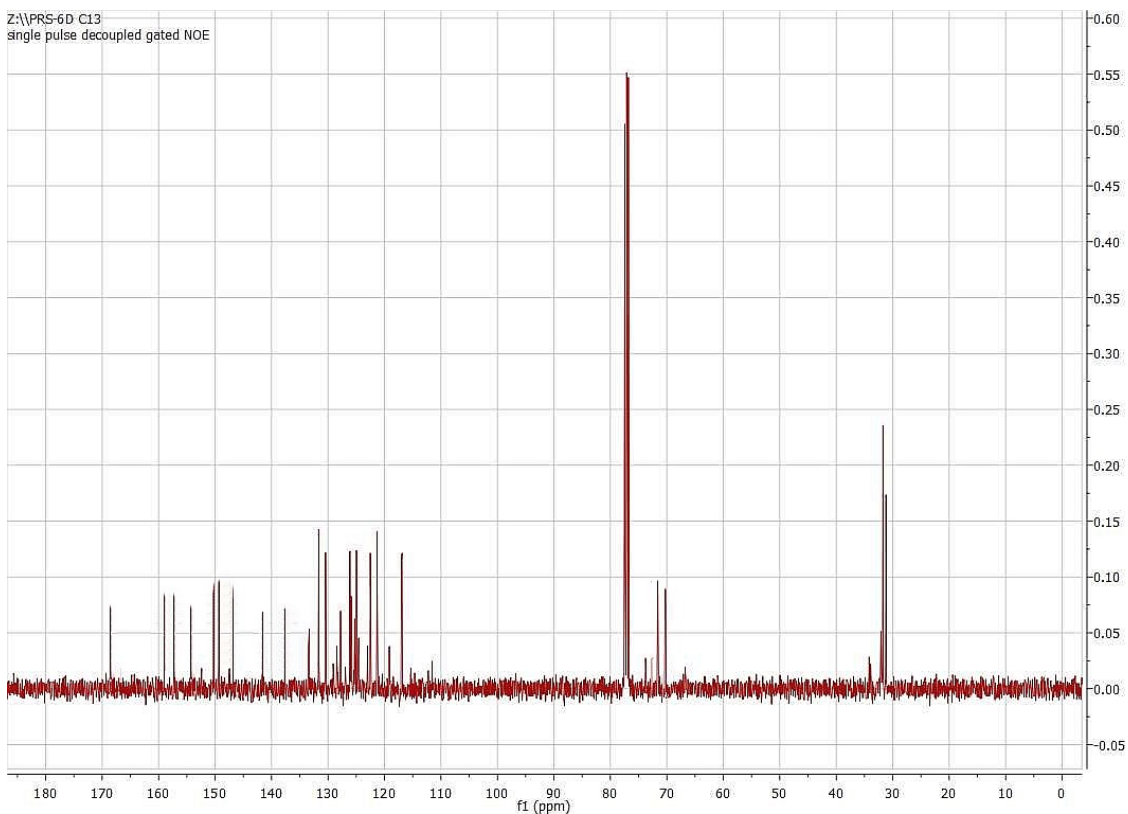

Figure S3:  $^{13}\text{C}$  NMR of Receptor 1.

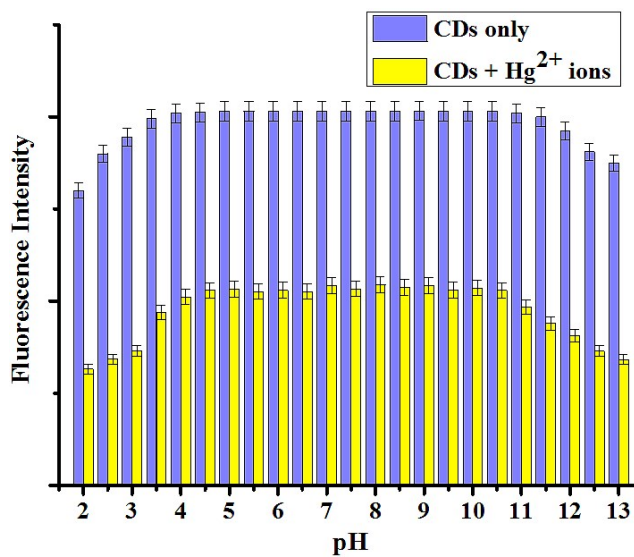

Figure S4: Fluorescence spectra showing stability of the CDs in the presence of  $\text{Hg}^{2+}$  ions in a wide range of pH.

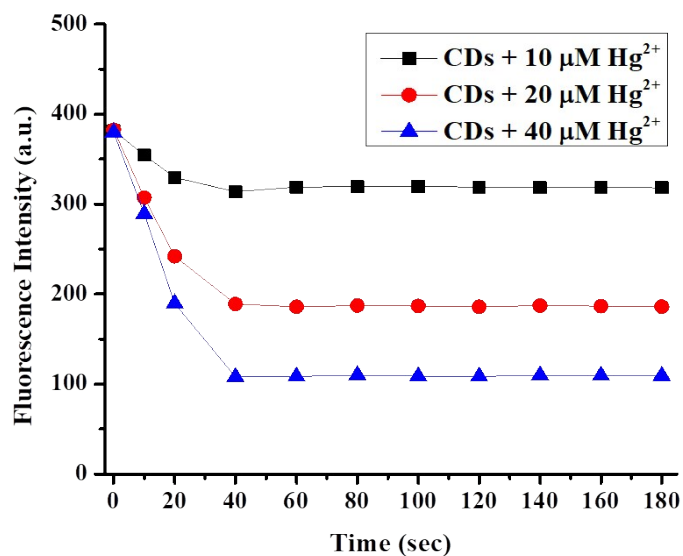

Figure S5: Time-dependent variation in fluorescence emission intensity of the CDs upon addition of different concentrations of Hg<sup>2+</sup> ions (0-40 μM) showing response time of the order of less than one minute (40 secs).

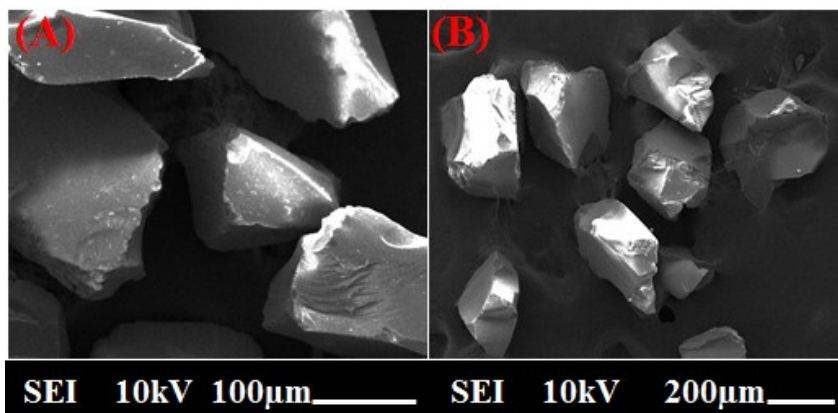

Figure S6: Scanning Emission Micrographs of (A) Bare silica of mesh size 60-120, and (B) Silica coated with CDs.

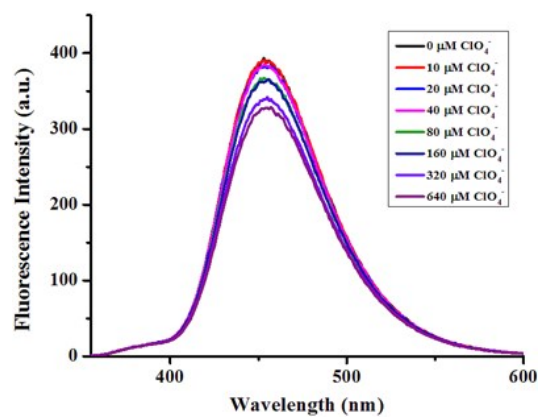

Figure S7: Fluorescence emission profile of CDs upon addition of increasing concentrations of perchlorate salt (0-640  $\mu\text{M}$ ).

| <b>Zeta Potential Report</b> |               |
|------------------------------|---------------|
| Mobility                     | -4.28u/s/V/cm |
| Zeta Potential               | -54.1 mv      |
| Charge                       | -0.02550 fC   |
| Polarity                     | Negative      |
| Conductivity                 | 14 uS/cm      |
| Field Strength               | 5.0 kV/m      |
| Sample Information           |               |
| Fluid                        |               |
| CDs                          |               |
| Viscosity                    | 0.81          |
| Temperature                  | 29.25 C       |
| Dielectric Const             | 80            |
| Dispersant                   |               |
| DMSO:WATER                   |               |
| pH                           | 7             |
| QDS                          |               |

Figure S8: Zeta Potential Report of the as-synthesized CDs.

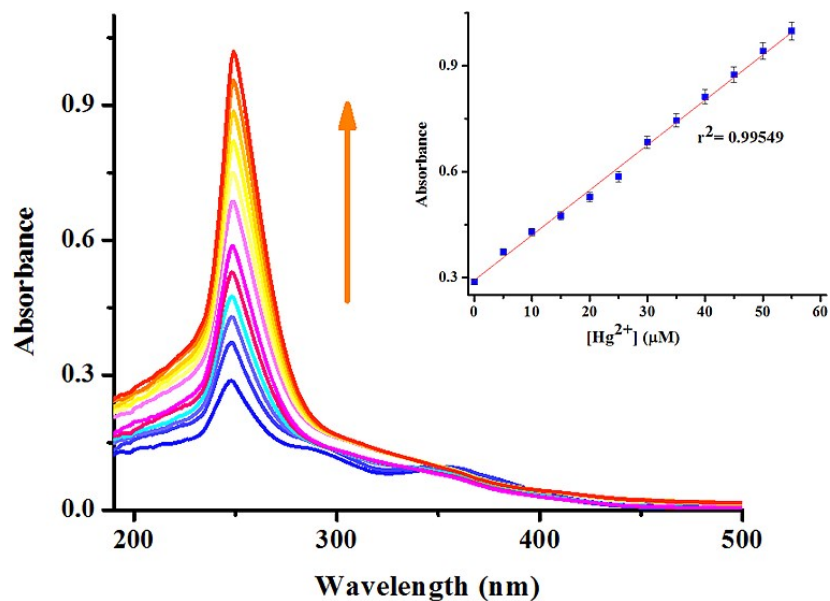

Figure S9: UV-Visible spectra of CDs on addition of increasing concentrations of  $\text{Hg}^{2+}$  ions (0-55  $\mu\text{M}$ ) showing hyperchromic shift in the peak at 249 nm and diminution of the peak at 350 nm with a linear progression coefficient of 0.99549 in a wide dynamic range of up to 55  $\mu\text{M}$ .

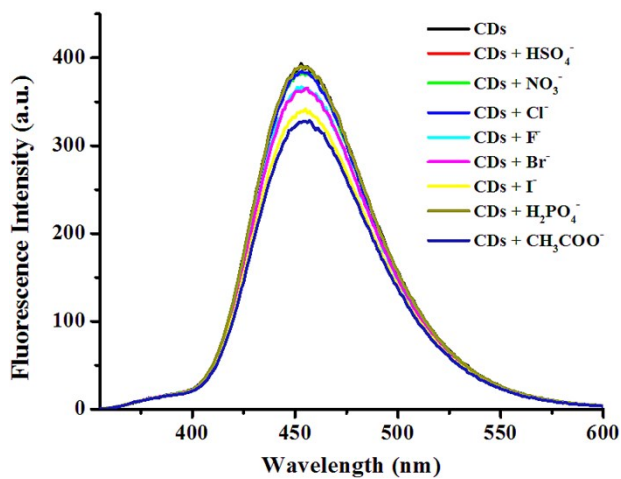

Figure S10: Fluorescence response of CDs upon addition of various anions depicting negligible change in the emission spectrum.

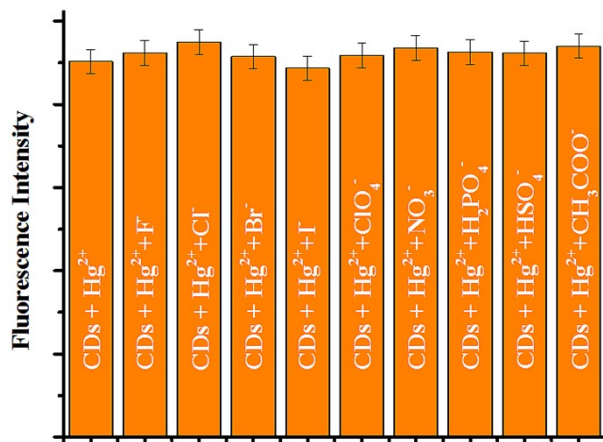

Figure S11: Fluorescence emission spectra of CDs in the presence of  $\text{Hg}^{2+}$  ions showing insignificant change upon addition of an array of anions as interferent species.

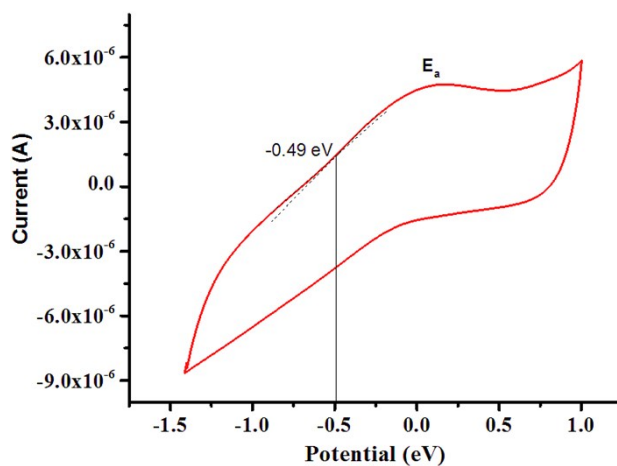

Figure S12: Cyclic Voltammogram of CDs indicating  $E_{\text{ox}} = 0.49$  eV.

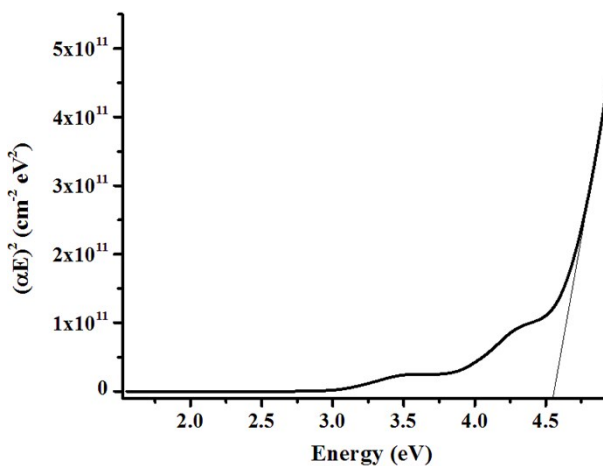

Figure S13: TAUC Plot of the CDs showing band gap of 4.55 eV.

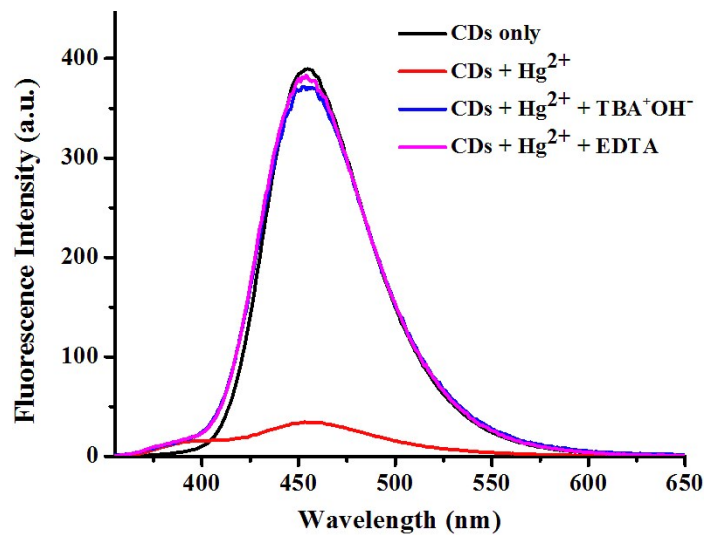

Figure S14: Fluorescence emission profile of CDs exhibits quenching in the presence of Hg<sup>2+</sup> ions and the emission intensity is recovered upon addition of aqueous EDTA or tetrabutylammonium hydroxide solution.
